# Supplementary material for: Natural Silk as a Photonics Component: a Study on Its Light Guiding and Nonlinear Optical Properties
Source: PubMed Central journal article supplement (PMC4772132; doi:10.1038/srep22358), 2016-03-01
Supplement: srep22358-s1.pdf [file srep22358-s1.pdf]

# Natural Silk as a Photonics Component: a Study on Its Light Guiding and Nonlinear Optical Properties

Sami Kujala<sup>1,\*</sup>, Anna Mannila<sup>1,2</sup>, Lasse Karvonen<sup>1</sup>, Khanh Kieu<sup>3</sup>, and Zhipei Sun<sup>1,\*</sup>

<sup>1</sup>Aalto University, Department of Micro and Nanosciences, PO. Box 13500, FI-00076 Aalto, Finland

<sup>2</sup>Spinverse Ltd., Innopoli 2, Tekniikantie 14, FI-02150 Espoo, Finland

<sup>3</sup>University of Arizona, College of Optical Sciences, 1630 E University Blvd, Tucson, AZ 85721, USA

\*sami.kujala@aalto.fi

\*zhipei.sun@aalto.fi

## ABSTRACT

Supplementary material to complement the main article of details of the obtained data and some additional results.

## List of Figures

|    |                                                              |   |
|----|--------------------------------------------------------------|---|
| S1 | Results of cutback experiments on Sample 1–3 and 5 . . . . . | 2 |
| S2 | Results of cutback experiments on Sample 4 . . . . .         | 3 |

## List of Tables

|    |                                                                              |   |
|----|------------------------------------------------------------------------------|---|
| S1 | Determined loss coefficients as determined with the cutback method . . . . . | 4 |
|----|------------------------------------------------------------------------------|---|

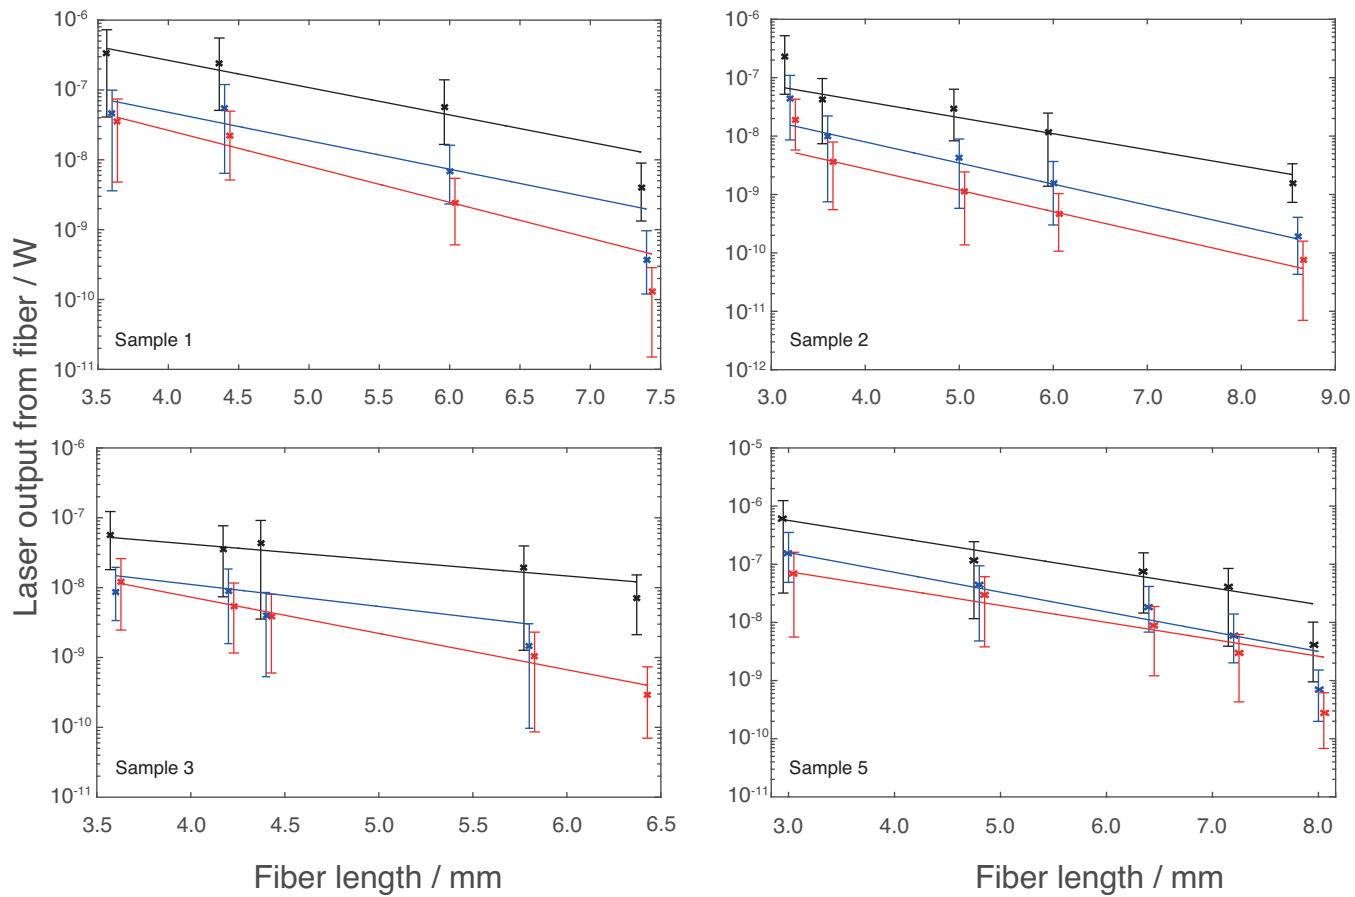

**Figure S1.** Results of cutback experiments on Sample 1–3 and 5. Again, the error bars indicate 25% and 75% percentiles of the data. Data for 520 nm and 730 nm is slightly offset to right and left, respectively, to improve readability. Lines are fits to the Beer-Lambert law [Equation (1)].

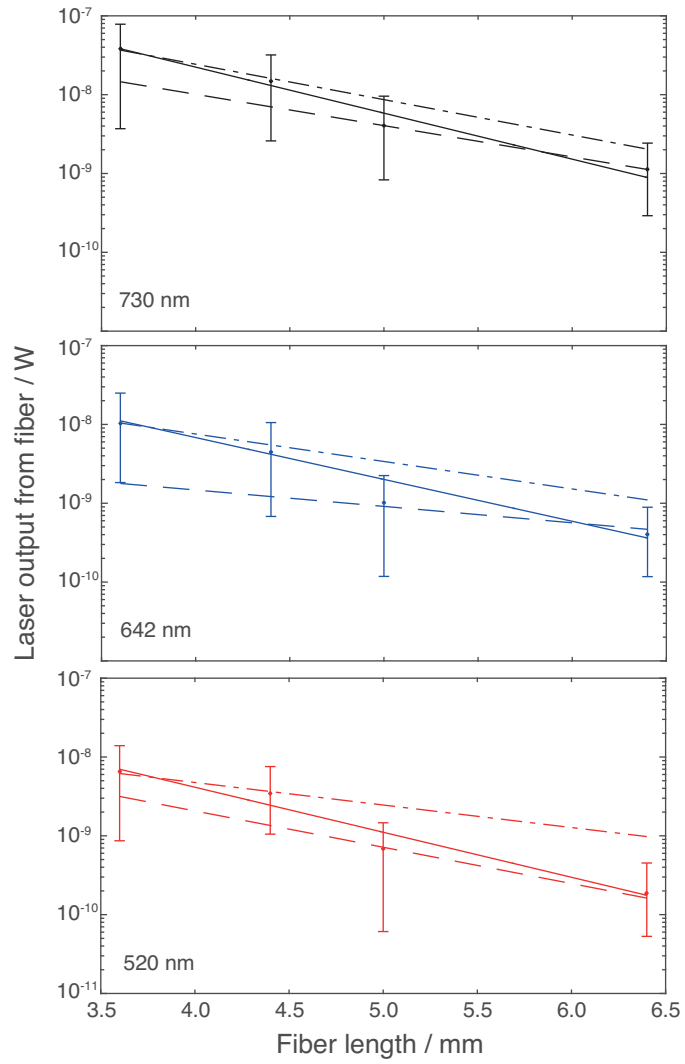

**Figure S2.** Results of cutback experiments on Sample 4. The error bars indicate 25% and 75% percentiles of the data. Legend: Lines are fits to the Beer-Lambert law [Equation (1)] fitted to; all data points – solid lines, data sets of two shortest fiber lengths – dash-dot lines, and data sets of two longest fiber lengths – dashed lines.

**Table S1.** Determined loss coefficients in units of dB mm<sup>-1</sup> as determined with the cutback method. Numbers in parenthesis indicate the uncertainty in fitted parameters, as given by the numerical fitting routine.

| Wavelength            | 520 nm  | 642 nm   | 730 nm   |
|-----------------------|---------|----------|----------|
| Sample 4              | 5.71(6) | 5.31(8)  | 5.84(3)  |
| Sample 4 <sup>a</sup> | 4.20(5) | 4.12(15) | 5.58(6)  |
| Sample 4 <sup>b</sup> | 4.89(7) | 2.84(5)  | 4.78(11) |

a) Data sets corresponding to two longest fiber lengths used for fitting; b) Data sets corresponding to two shortest fiber lengths used for fitting.
